# Supplementary figures and images for: Exosomes derived from hypoxic mesenchymal stem cells restore ovarian function by enhancing angiogenesis
Source: PubMed Central journal article supplement — Stem Cell Res Ther. 2024 Dec 21;15:496. doi: 10.1186/s13287-024-04111-6 (PMC11663355; doi:10.1186/s13287-024-04111-6), 2024-12-21

Supplementary figure 1

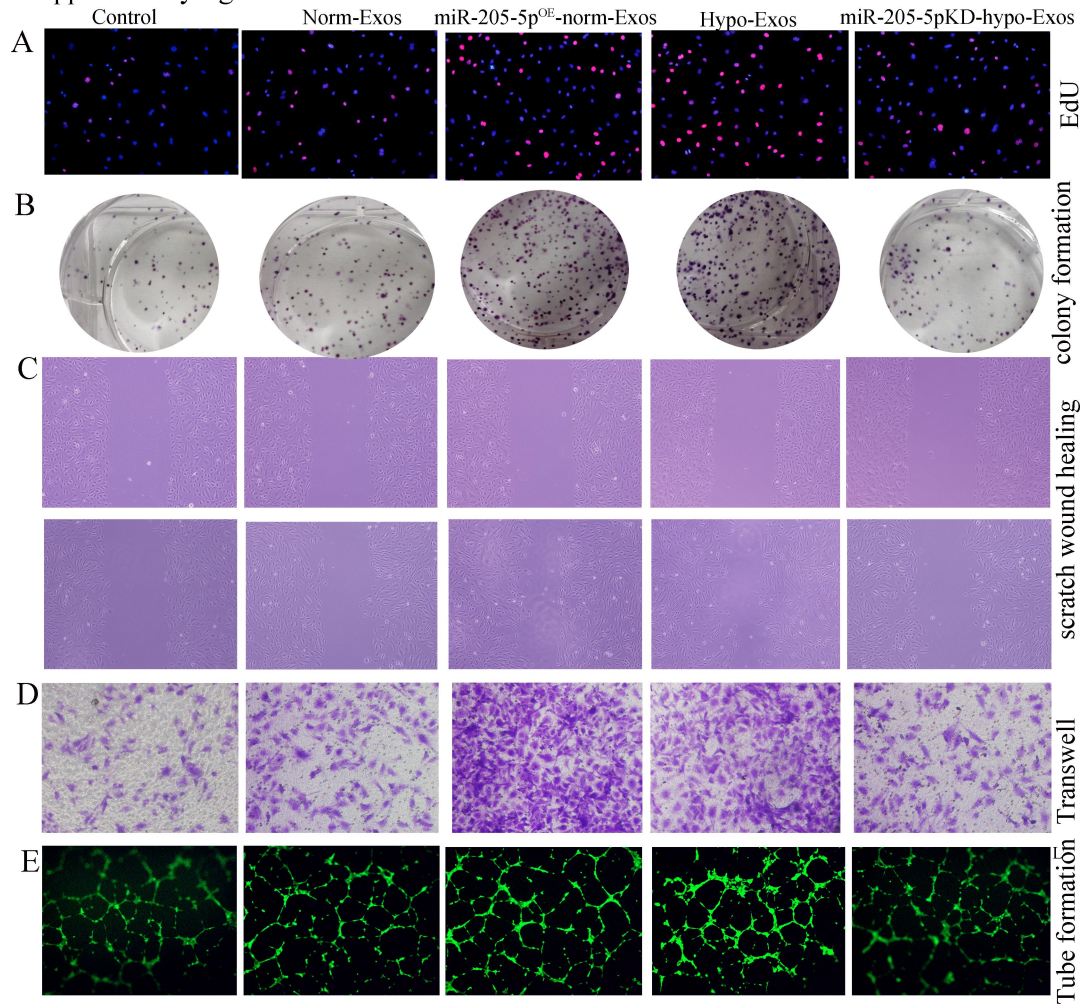

Supplementary figure 2

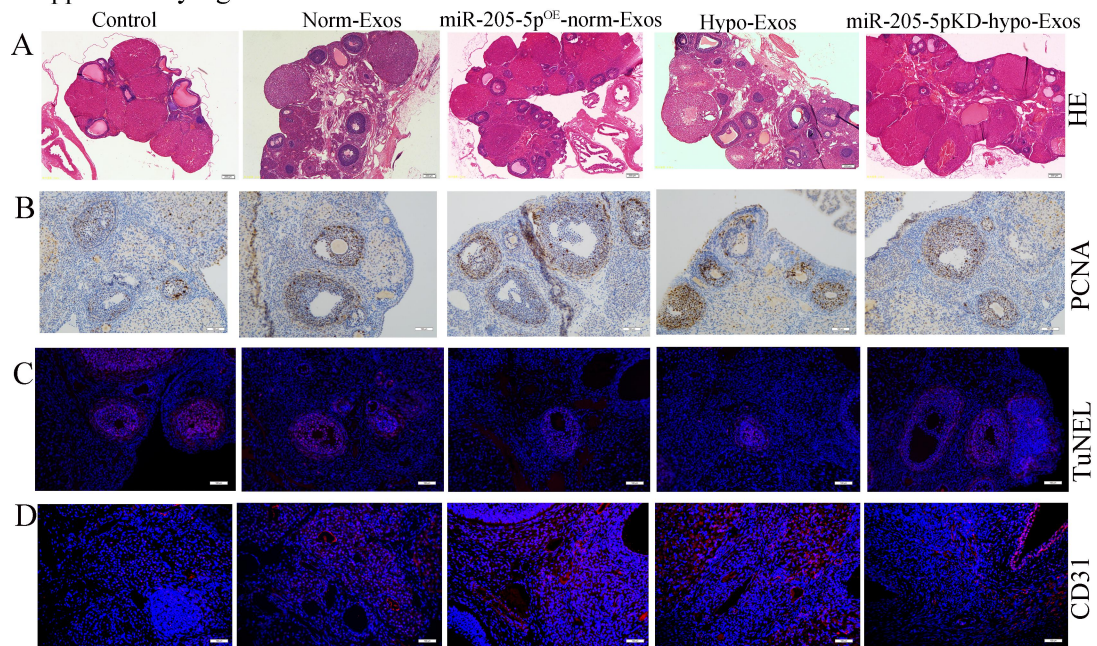

Supplementary figure 3

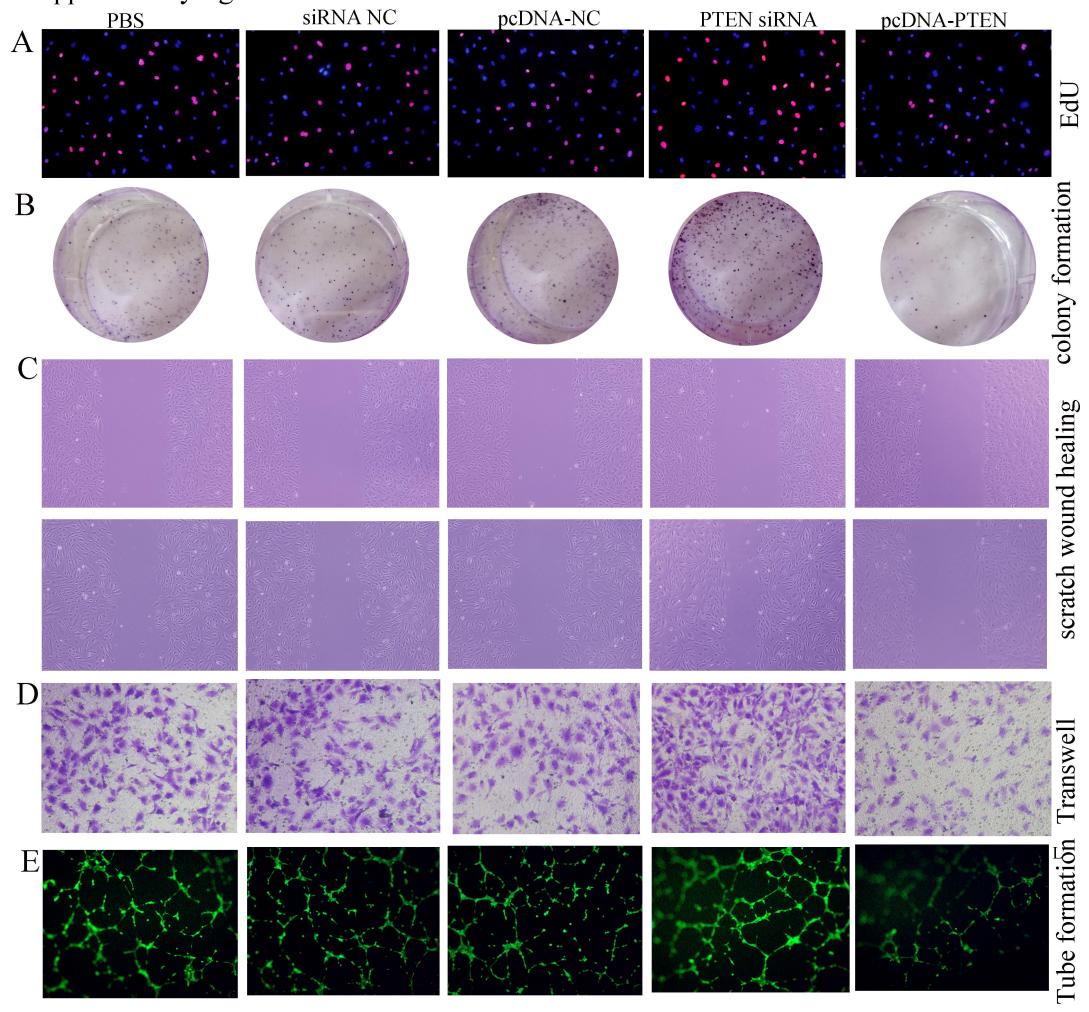

Supplement: 13287_2024_4111_MOESM2_ESM.pdf [file 13287_2024_4111_MOESM2_ESM.pdf]
